# Supplementary material for: Chelerythrine–lysozyme interaction: spectroscopic studies, thermodynamics and molecular modeling exploration
Source: Royal Society of Chemistry journal article supplement (doi:10.1039/c5cp00424a), 2015-01-01
Supplement: c5cp00424a1.pdf [file c5cp00424a1.pdf]

## Supporting Information

### **Chelerythrine-lysozyme interaction: spectroscopic studies, thermodynamics and molecular modeling exploration**

Chandrima Jash<sup>†¶</sup>, Pritha Basu<sup>†¶</sup>, Pavan V Payghan,<sup>‡¶</sup> Nanda Ghoshal,<sup>‡</sup> and Gopinatha Suresh Kumar<sup>\*†</sup>

<sup>†</sup>Biophysical Chemistry Laboratory, Chemistry Division

<sup>‡</sup>Structural Biology and Bioinformatics Division

CSIR-Indian Institute of Chemical Biology, 4, Raja SC Mullick Road

Kolkata 700 032, INDIA

\*To whom correspondence should be addressed.

Phone: +91 33 2472 4049 /2499 5723

Fax: +91 33 2473 0284 / 5197

e-mail: [gskumar@iicb.res.in](mailto:gskumar@iicb.res.in)/[gskumar@csiriicb.in](mailto:gskumar@csiriicb.in)

<sup>¶</sup>These authors contributed equally.

**Table S1** Summary of the optical properties of chelerythrine <sup>a</sup>

| <b>Absorbance</b>                 |               |              |
|-----------------------------------|---------------|--------------|
| Parameter                         | Chelerythrine |              |
|                                   | iminium       | alkanolamine |
| $\lambda_{\max}$ (free)           | 316           | 318          |
| $\epsilon$ (at $\lambda_{\max}$ ) | 37,060        | 16,790       |
| <b>Fluorescence</b>               |               |              |
| $\lambda_{\max}$ (excitation)     | 338           | 318          |
| $\lambda_{\max}$ (emission)       | 550           | 419          |

<sup>a</sup> Units of  $\lambda$ , nm,  $\epsilon$  (molar extinction coefficient),  $M^{-1} \text{ cm}^{-1}$ .

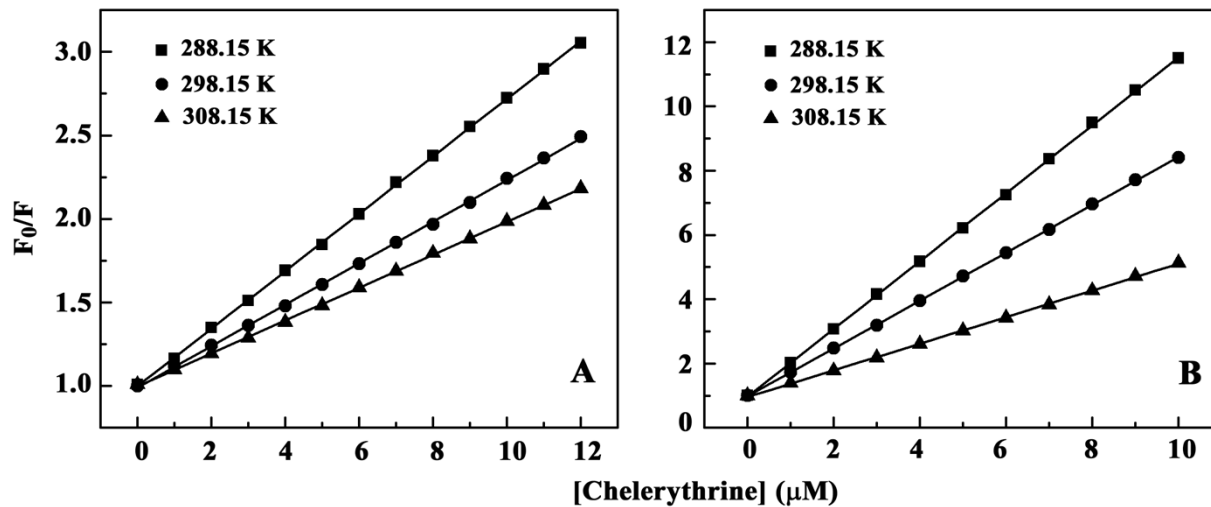

Figure S1. Stern–Volmer plots for the quenching of Lyz fluorescence by (A) iminium and (B) alkanolamine form of chelerythrine at different temperatures.

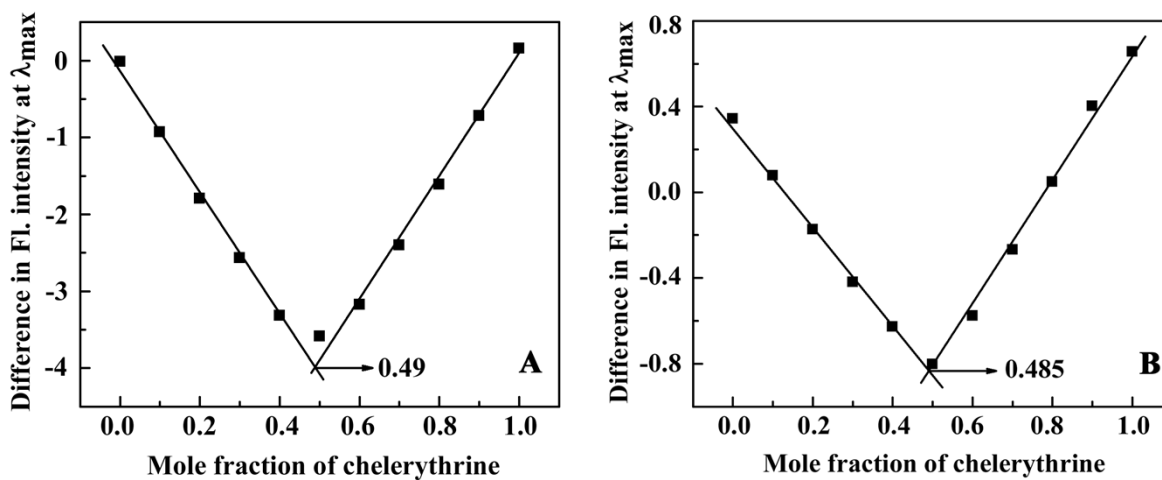

Figure S2. Job plot for the binding of chelerythrine (A) iminium and (B) alkanolamine forms to the Lyz. Fluorescence quenching of Lyz was monitored at 339 nm exciting at 295 nm.

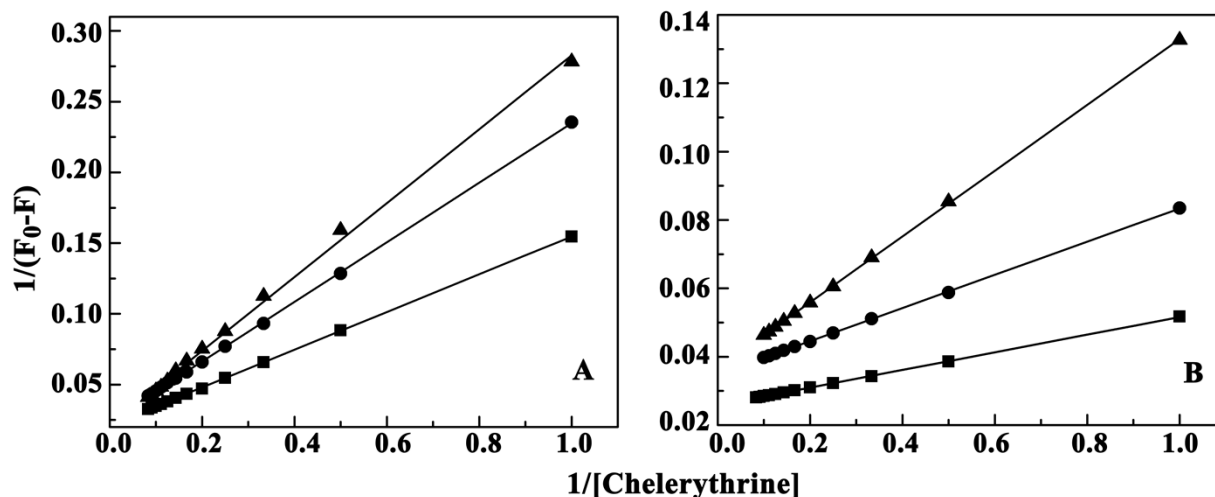

Figure S3. Lineweaver-Burk plots for the quenching of Lyz fluorescence by chelerythrine (A) iminium and (B) alkanolamine at temperatures 288.15 K (filled square), 298.15 K (filled circle) and 308.15 K (filled triangle).

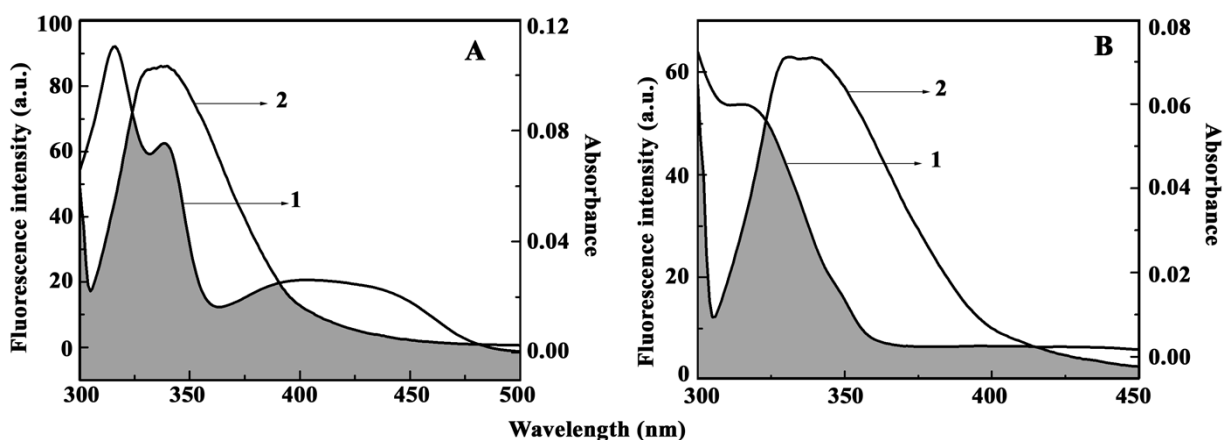

Figure S4. Overlap (shaded portion) of Lyz fluorescence spectrum and absorption spectra of chelerythrine (A) iminium and (B) alkanolamine. In panel (A) and (B) curve 1 represent absorption spectra of (A) iminium and (B) alkanolamine and curve 2 represent the fluorescence spectrum of Lyz. The excitation of Lyz was done at 295 nm. The ratio of the concentration of  $[\text{Lyz}]:[\text{alkaloids}] = 1:1$ .

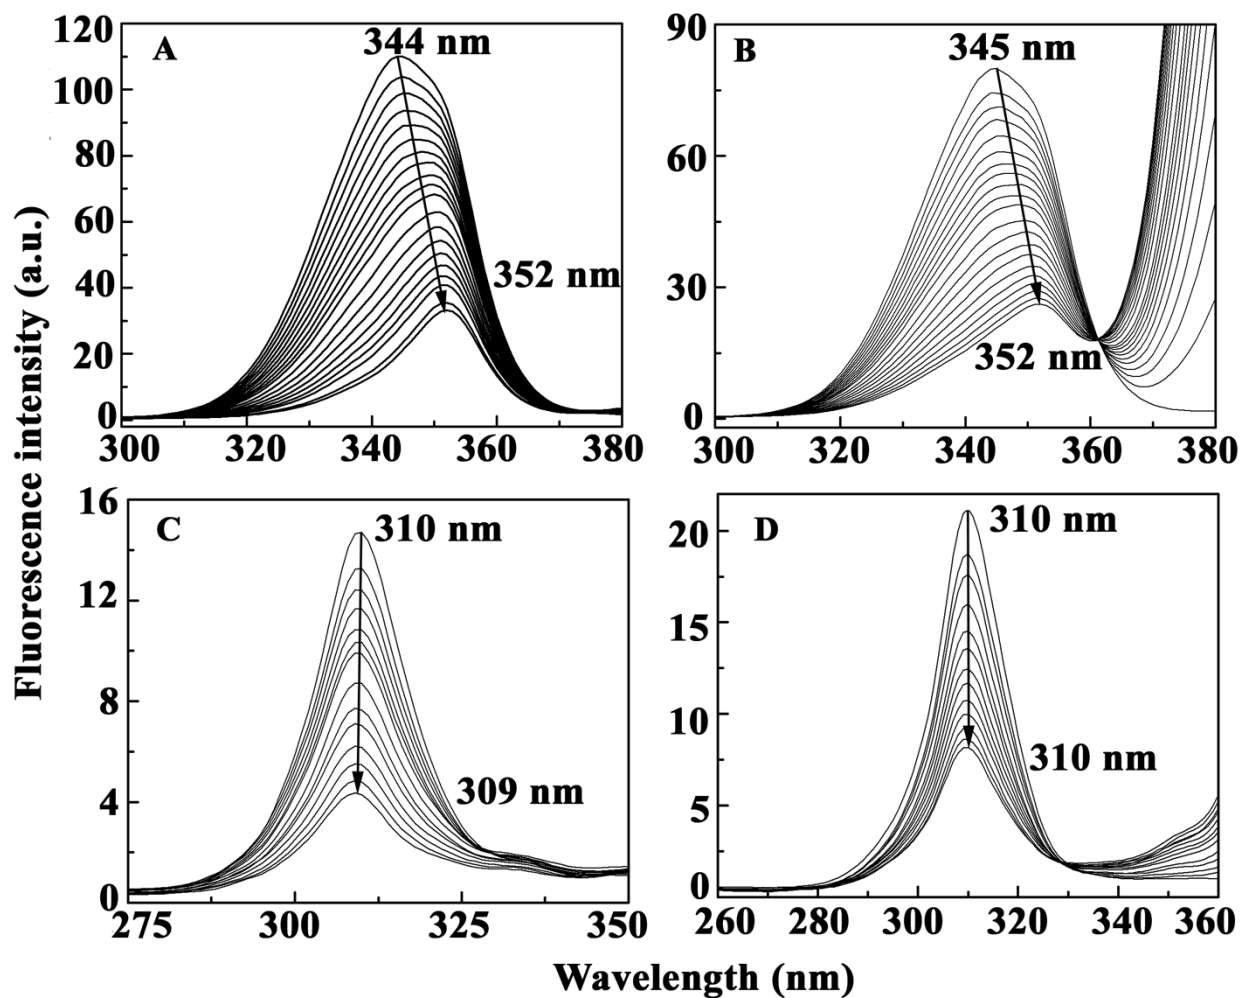

Figure S5. Synchronous fluorescence spectra at  $\Delta\lambda = 60$  nm (A, B) and  $\Delta\lambda = 15$  nm (C, D) of Lyz in the presence of different concentrations of (A,C) iminium and (B,D) alkanolamine form of chelerythrine.  $[\text{Lyz}] = 1\mu\text{M}$ .

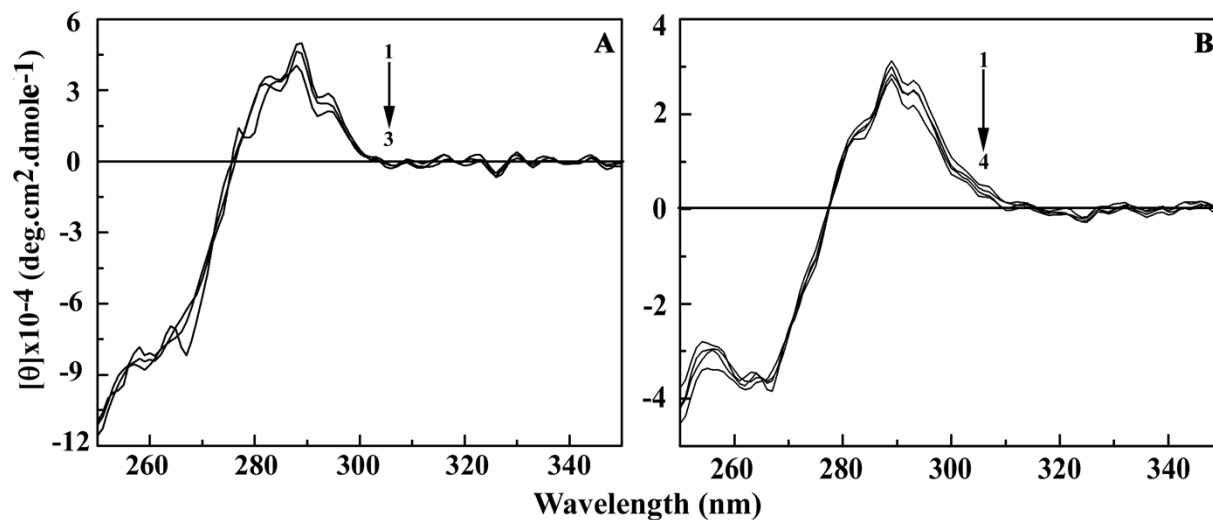

Figure S6. Near UV CD spectra of Lyz (25  $\mu\text{M}$ ) treated with various concentrations of chelerythrine (A) iminium and (B) alkanolamine. In panel (A) curves (1–3) denote 0, 20 and 40  $\mu\text{M}$  of iminium and (B) curves (1–4) denote 0, 10, 20 and 40  $\mu\text{M}$  of alkanolamine, respectively.

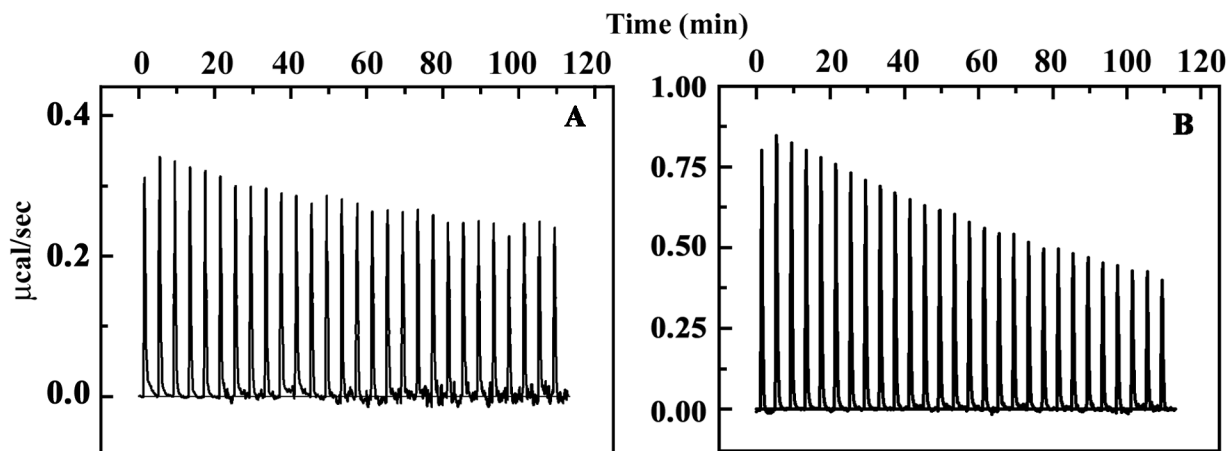

Figure S7. The panels present raw results for the sequential injection of Lyz of 0.5 mM and 0.8 mM into respective buffer of (A) pH 6.4 and (B) pH 9.2.

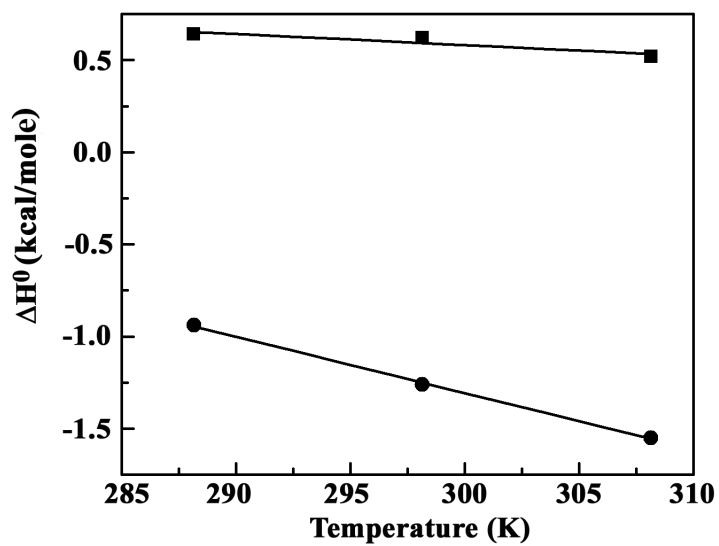

Figure S8. Plot of variation of thermodynamic parameter  $\Delta H^\circ$  for alkaloids–Lyz complex formation.  $\Delta H^\circ$  versus Temperature (Kelvin) for the binding of iminium (filled square) and alkanolamine (filled circle) form of chelerythrine with Lyz.
